# Supplementary material
Source: Springer Nature journal article supplement (https://authors.library.caltech.edu/105827/16/12860_2010_530_MOESM9_ESM.pdf)

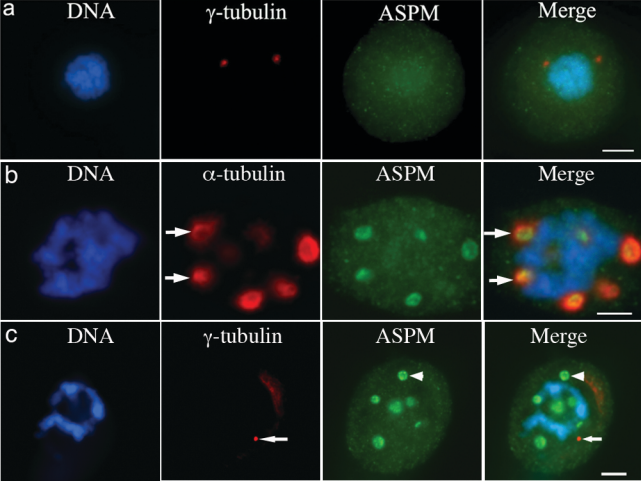

Supplement: MOESM9 [file 12860_2010_530_MOESM9_ESM.pdf]
